# Supplementary material for: Modulation of Myelopoiesis Progenitors Is an Integral Component of Trained Immunity
Source: PubMed Central journal article supplement — Cell. 2018 Jan 11;172(1-2):147–161.e12. doi: 10.1016/j.cell.2017.11.034 (PMC5766828; doi:10.1016/j.cell.2017.11.034), 2018-01-11
Supplement: mmc1.pdf [file mmc1.pdf]

## Supplemental Information

### Modulation of Myelopoiesis Progenitors

### Is an Integral Component of Trained Immunity

**Ioannis Mitroulis, Klara Ruppova, Baomei Wang, Lan-Sun Chen, Michal Grzybek, Tatyana Grinenko, Anne Eugster, Maria Troullinaki, Alessandra Palladini, Ioannis Kourtzelis, Antonios Chatzigeorgiou, Andreas Schlitzer, Marc Beyer, Leo A.B. Joosten, Berend Isermann, Mathias Lesche, Andreas Petzold, Kai Simons, Ian Henry, Andreas Dahl, Joachim L. Schultze, Ben Wielockx, Nicola Zamboni, Peter Mirtschink, Ünal Coskun, George Hajishengallis, Mihai G. Netea, and Triantafyllos Chavakis**

| NAME                                      | SIZE | ES       | NES     | NOM p-val  | FDR q-val | FWER p-val | RANK AT MAX | LEADING EDGE                   |
|-------------------------------------------|------|----------|---------|------------|-----------|------------|-------------|--------------------------------|
| HALLMARK_CHOLESTEROL_HOMEOSTASIS          | 67   | 0.776022 | 2.2576  | 0          | 0         | 0          | 1944        | tags=46%, list=7%, signal=49%  |
| HALLMARK_GLYCOLYSIS                       | 191  | 0.579825 | 1.9584  | 0          | 0         | 0          | 4212        | tags=41%, list=15%, signal=48% |
| HALLMARK_INFLAMMATORY_RESPONSE            | 186  | 0.574351 | 1.9324  | 0          | 0         | 0          | 2241        | tags=33%, list=8%, signal=35%  |
| HALLMARK_MTORC1_SIGNALING                 | 192  | 0.556296 | 1.8398  | 0          | 0.001179  | 0.003      | 2530        | tags=37%, list=9%, signal=40%  |
| HALLMARK_IL6_JAK_STAT3_SIGNALING          | 82   | 0.614739 | 1.792   | 0          | 0.004545  | 0.013      | 2241        | tags=46%, list=8%, signal=50%  |
| HALLMARK_ANGIOGENESIS                     | 34   | 0.70841  | 1.7873  | 0          | 0.003788  | 0.013      | 3852        | tags=47%, list=13%, signal=54% |
| HALLMARK_COMPLEMENT                       | 176  | 0.532641 | 1.7361  | 0          | 0.005566  | 0.023      | 2194        | tags=30%, list=8%, signal=32%  |
| HALLMARK_PI3K_AKT_MTOR_SIGNALING          | 103  | 0.556708 | 1.696   | 0          | 0.007204  | 0.033      | 2912        | tags=34%, list=10%, signal=38% |
| HALLMARK_COAGULATION                      | 121  | 0.530167 | 1.668   | 0          | 0.009552  | 0.047      | 2194        | tags=27%, list=8%, signal=29%  |
| HALLMARK_APICAL_JUNCTION                  | 186  | 0.494473 | 1.6345  | 0.00350877 | 0.011379  | 0.064      | 4242        | tags=30%, list=15%, signal=35% |
| HALLMARK_OXIDATIVE_PHOSPHORYLATION        | 192  | 0.488849 | 1.6183  | 0          | 0.011696  | 0.072      | 4910        | tags=52%, list=17%, signal=62% |
| HALLMARK_INTERFERON_GAMMA_RESPONSE        | 183  | 0.452518 | 1.5068  | 0.00342466 | 0.031385  | 0.196      | 1794        | tags=33%, list=6%, signal=35%  |
| HALLMARK_EPITHELIAL_MESENCHYMAL_TRANSITIO | 183  | 0.451338 | 1.4844  | 0          | 0.03592   | 0.237      | 3966        | tags=30%, list=14%, signal=35% |
| HALLMARK_INTERFERON_ALPHA_RESPONSE        | 87   | 0.483987 | 1.4564  | 0.02486188 | 0.043383  | 0.294      | 1768        | tags=33%, list=6%, signal=35%  |
| HALLMARK_PROTEIN_SECRETION                | 94   | 0.466087 | 1.4307  | 0.02941177 | 0.052524  | 0.356      | 1719        | tags=29%, list=6%, signal=30%  |
| HALLMARK_HYPOXIA                          | 188  | 0.422134 | 1.4128  | 0.0177305  | 0.057679  | 0.405      | 3095        | tags=31%, list=11%, signal=35% |
| HALLMARK_UV_RESPONSE_UP                   | 144  | 0.428431 | 1.388   | 0.03355705 | 0.066116  | 0.476      | 2137        | tags=22%, list=7%, signal=24%  |
| HALLMARK_ANDROGEN_RESPONSE                | 93   | 0.447132 | 1.3526  | 0.05571847 | 0.081232  | 0.58       | 4168        | tags=40%, list=14%, signal=46% |
| HALLMARK_UNFOLDED_PROTEIN_RESPONSE        | 111  | 0.424025 | 1.3286  | 0.05172414 | 0.093552  | 0.656      | 4714        | tags=30%, list=16%, signal=35% |
| HALLMARK_ALLOGRAFT_REJECTION              | 178  | 0.406291 | 1.3268  | 0.02888087 | 0.090392  | 0.663      | 2241        | tags=26%, list=8%, signal=28%  |
| HALLMARK_ESTROGEN_RESPONSE_LATE           | 181  | 0.386633 | 1.2927  | 0.05862069 | 0.107784  | 0.743      | 3124        | tags=28%, list=11%, signal=31% |
| HALLMARK_TNFA_SIGNALING_VIA_NFKB          | 194  | 0.382343 | 1.2886  | 0.02909091 | 0.105119  | 0.75       | 2438        | tags=23%, list=8%, signal=25%  |
| HALLMARK_XENOBIOTIC_METABOLISM            | 178  | 0.360666 | 1.2054  | 0.09375    | 0.167806  | 0.915      | 2218        | tags=22%, list=8%, signal=24%  |
| HALLMARK_P53_PATHWAY                      | 193  | 0.356814 | 1.1888  | 0.11032029 | 0.178908  | 0.933      | 2222        | tags=20%, list=8%, signal=22%  |
| HALLMARK_DNA_REPAIR                       | 137  | 0.33609  | 1.0647  | 0.30844155 | 0.349827  | 0.994      | 2914        | tags=20%, list=10%, signal=23% |
| HALLMARK_APICAL_SURFACE                   | 44   | 0.345307 | 0.931   | 0.5463415  | 0.628539  | 1          | 926         | tags=11%, list=3%, signal=12%  |
| HALLMARK_MYC_TARGETS_V2                   | 58   | 0.310515 | 0.8618  | 0.6879607  | 0.761442  | 1          | 3441        | tags=17%, list=12%, signal=20% |
| HALLMARK_HEDGEHOG_SIGNALING               | 32   | -0.33203 | -0.7406 | 0.77959925 | 0.882188  | 1          | 3999        | tags=25%, list=14%, signal=29% |
| HALLMARK_PEROXISOME                       | 91   | -0.33388 | -0.8661 | 0.64605874 | 0.705     | 1          | 3618        | tags=21%, list=13%, signal=24% |
| HALLMARK_UV_RESPONSE_DN                   | 141  | -0.35434 | -0.9918 | 0.45857143 | 0.501231  | 1          | 2631        | tags=18%, list=9%, signal=20%  |
| HALLMARK_WNT_BETA_CATENIN_SIGNALING       | 38   | -0.43281 | -1.0185 | 0.4450262  | 0.479633  | 1          | 3447        | tags=16%, list=12%, signal=18% |
| HALLMARK_ESTROGEN_RESPONSE_EARLY          | 186  | -0.37443 | -1.0596 | 0.35362318 | 0.433436  | 1          | 2844        | tags=17%, list=10%, signal=19% |
| HALLMARK_ADIPOGENESIS                     | 195  | -0.37341 | -1.0759 | 0.33873144 | 0.428238  | 1          | 2052        | tags=13%, list=7%, signal=14%  |
| HALLMARK_PANCREAS_BETA_CELLS              | 30   | -0.47206 | -1.0782 | 0.34655172 | 0.449135  | 1          | 1454        | tags=13%, list=5%, signal=14%  |
| HALLMARK_MYC_TARGETS_V1                   | 198  | -0.38203 | -1.0918 | 0.30123797 | 0.451208  | 1          | 3724        | tags=22%, list=13%, signal=25% |
| HALLMARK_IL2_STAT5_SIGNALING              | 192  | -0.40005 | -1.1482 | 0.23913044 | 0.377971  | 1          | 1757        | tags=17%, list=6%, signal=18%  |
| HALLMARK_APOPTOSIS                        | 154  | -0.4146  | -1.1628 | 0.23706897 | 0.378633  | 1          | 889         | tags=12%, list=3%, signal=12%  |
| HALLMARK_TGF_BETA_SIGNALING               | 53   | -0.46959 | -1.1788 | 0.25415283 | 0.379338  | 1          | 2669        | tags=28%, list=9%, signal=31%  |
| HALLMARK_FATTY_ACID_METABOLISM            | 144  | -0.42531 | -1.1908 | 0.20118344 | 0.389424  | 1          | 1124        | tags=11%, list=4%, signal=12%  |
| HALLMARK_BILE_ACID_METABOLISM             | 98   | -0.45134 | -1.1937 | 0.2179289  | 0.419667  | 1          | 1756        | tags=16%, list=6%, signal=17%  |
| HALLMARK_MYOGENESIS                       | 187  | -0.41828 | -1.1956 | 0.1822034  | 0.45801   | 1          | 2578        | tags=17%, list=9%, signal=18%  |
| HALLMARK_REACTIVE_OXIGEN_SPECIES_PATHWA   | 44   | -0.50347 | -1.2258 | 0.22013652 | 0.440712  | 0.995      | 1318        | tags=20%, list=5%, signal=21%  |
| HALLMARK_KRAS_SIGNALING_UP                | 179  | -0.4478  | -1.2676 | 0.10970464 | 0.40298   | 0.989      | 1623        | tags=13%, list=6%, signal=14%  |
| HALLMARK_SPERMATOGENESIS                  | 114  | -0.49177 | -1.3222 | 0.11044776 | 0.344572  | 0.97       | 3305        | tags=22%, list=11%, signal=25% |
| HALLMARK_NOTCH_SIGNALING                  | 31   | -0.58139 | -1.3371 | 0.14436619 | 0.366539  | 0.957      | 3537        | tags=26%, list=12%, signal=29% |
| HALLMARK_MITOTIC_SPINDLE                  | 195  | -0.51966 | -1.4779 | 0.01445087 | 0.17935   | 0.753      | 3436        | tags=30%, list=12%, signal=34% |
| HALLMARK_G2M_CHECKPOINT                   | 196  | -0.61336 | -1.7514 | 0.00144092 | 0.019057  | 0.106      | 3708        | tags=43%, list=13%, signal=49% |
| HALLMARK_KRAS_SIGNALING_DN                | 166  | -0.62563 | -1.7621 | 0.00141243 | 0.022798  | 0.097      | 1624        | tags=10%, list=6%, signal=10%  |
| HALLMARK_E2F_TARGETS                      | 194  | -0.65775 | -1.8718 | 0          | 0.007877  | 0.023      | 3475        | tags=37%, list=12%, signal=41% |
| HALLMARK_HEME_METABOLISM                  | 181  | -0.89676 | -2.5523 | 0          | 0         | 0          | 1128        | tags=50%, list=4%, signal=52%  |
