# Supplementary material for: Modulation of Myelopoiesis Progenitors Is an Integral Component of Trained Immunity
Source: PubMed Central journal article supplement — Cell. 2018 Jan 11;172(1-2):147–161.e12. doi: 10.1016/j.cell.2017.11.034 (PMC5766828; doi:10.1016/j.cell.2017.11.034), 2018-01-11
Supplement: mmc2.pdf [file mmc2.pdf]

| NAME                                       | SIZE | ES        | NES       | NOM p-val   | FDR q-val | FWER p-val | RANK AT MAX | LEADING EDGE                   |
|--------------------------------------------|------|-----------|-----------|-------------|-----------|------------|-------------|--------------------------------|
| HALLMARK_EPITHELIAL_MESENCHYMAL_TRANSITION | 190  | 0.740248  | 2.461126  | 0           | 0         | 0          | 2017        | tags=37%, list=6%, signal=40%  |
| HALLMARK_UV_RESPONSE_DN                    | 141  | 0.683672  | 2.207074  | 0           | 0         | 0          | 3597        | tags=35%, list=11%, signal=40% |
| HALLMARK_APICAL_SURFACE                    | 44   | 0.742512  | 1.978215  | 0           | 0         | 0          | 4138        | tags=45%, list=13%, signal=52% |
| HALLMARK_ANGIOGENESIS                      | 34   | 0.762732  | 1.970397  | 0           | 0         | 0          | 2794        | tags=38%, list=9%, signal=42%  |
| HALLMARK_APICAL_JUNCTION                   | 191  | 0.556968  | 1.874511  | 0           | 6.87E-04  | 0.003      | 6122        | tags=46%, list=20%, signal=56% |
| HALLMARK_ALLOGRAFT_REJECTION               | 180  | 0.55448   | 1.835891  | 0           | 9.26E-04  | 0.005      | 3442        | tags=26%, list=11%, signal=29% |
| HALLMARK_COMPLEMENT                        | 178  | 0.542651  | 1.80276   | 0           | 0.001278  | 0.008      | 4341        | tags=32%, list=14%, signal=37% |
| HALLMARK_MITOTIC_SPINDLE                   | 194  | 0.495828  | 1.659241  | 0           | 0.007736  | 0.052      | 5540        | tags=39%, list=18%, signal=47% |
| HALLMARK_TGF_BETA_SIGNALING                | 54   | 0.581884  | 1.629837  | 0.008928572 | 0.008567  | 0.064      | 5052        | tags=41%, list=16%, signal=48% |
| HALLMARK_KRAS_SIGNALING_UP                 | 187  | 0.484069  | 1.601134  | 0           | 0.010093  | 0.085      | 3944        | tags=29%, list=13%, signal=33% |
| HALLMARK_HYPOXIA                           | 192  | 0.477815  | 1.589467  | 0.001557632 | 0.010281  | 0.095      | 3088        | tags=28%, list=10%, signal=30% |
| HALLMARK_ESTROGEN_RESPONSE_EARLY           | 192  | 0.471128  | 1.564385  | 0           | 0.013429  | 0.135      | 4552        | tags=31%, list=15%, signal=36% |
| HALLMARK_IL6_JAK_STAT3_SIGNALING           | 84   | 0.519795  | 1.554589  | 0.006734007 | 0.014243  | 0.154      | 2782        | tags=23%, list=9%, signal=25%  |
| HALLMARK_NOTCH_SIGNALING                   | 31   | 0.596461  | 1.529241  | 0.024118738 | 0.016389  | 0.186      | 3664        | tags=35%, list=12%, signal=40% |
| HALLMARK_MYOGENESIS                        | 192  | 0.450664  | 1.496211  | 0.001574803 | 0.02156   | 0.248      | 3366        | tags=21%, list=11%, signal=23% |
| HALLMARK_IL2_STAT5_SIGNALING               | 194  | 0.445494  | 1.494408  | 0.00152439  | 0.020544  | 0.252      | 3494        | tags=25%, list=11%, signal=28% |
| HALLMARK_ESTROGEN_RESPONSE_LATE            | 185  | 0.448604  | 1.474776  | 0.006420546 | 0.023735  | 0.303      | 4552        | tags=33%, list=15%, signal=38% |
| HALLMARK_COAGULATION                       | 127  | 0.461042  | 1.460545  | 0.01633987  | 0.026725  | 0.35       | 2601        | tags=20%, list=8%, signal=22%  |
| HALLMARK_INFLAMMATORY_RESPONSE             | 187  | 0.436969  | 1.455918  | 0.005970149 | 0.026342  | 0.365      | 3466        | tags=23%, list=11%, signal=26% |
| HALLMARK_GLYCOLYSIS                        | 190  | 0.434743  | 1.444143  | 0.004792332 | 0.028073  | 0.41       | 2614        | tags=24%, list=8%, signal=26%  |
| HALLMARK_ADIPOGENESIS                      | 196  | 0.411274  | 1.378431  | 0.007961784 | 0.050193  | 0.623      | 4005        | tags=23%, list=13%, signal=27% |
| HALLMARK_CHOLESTEROL_HOMEOSTASIS           | 68   | 0.460408  | 1.35071   | 0.052721087 | 0.061734  | 0.71       | 4005        | tags=24%, list=13%, signal=27% |
| HALLMARK_ANDROGEN_RESPONSE                 | 96   | 0.435144  | 1.339927  | 0.04786325  | 0.065475  | 0.744      | 4467        | tags=27%, list=14%, signal=31% |
| HALLMARK_TNFA_SIGNALING_VIA_NFKB           | 195  | 0.399056  | 1.320449  | 0.036253776 | 0.074854  | 0.807      | 3436        | tags=23%, list=11%, signal=25% |
| HALLMARK_APOPTOSIS                         | 154  | 0.397608  | 1.302786  | 0.05351682  | 0.083846  | 0.849      | 3576        | tags=23%, list=11%, signal=26% |
| HALLMARK_INTERFERON_GAMMA_RESPONSE         | 184  | 0.39202   | 1.291657  | 0.049284577 | 0.088772  | 0.881      | 4709        | tags=32%, list=15%, signal=37% |
| HALLMARK_HEDGEHOG_SIGNALING                | 34   | 0.466371  | 1.213141  | 0.21678321  | 0.160514  | 0.979      | 4625        | tags=32%, list=15%, signal=38% |
| HALLMARK_SPERMATOGENESIS                   | 121  | 0.368668  | 1.159522  | 0.17821783  | 0.229341  | 0.998      | 4435        | tags=25%, list=14%, signal=29% |
| HALLMARK_PI3K_AKT_MTOR_SIGNALING           | 103  | 0.354626  | 1.085433  | 0.29787233  | 0.347378  | 1          | 3936        | tags=20%, list=13%, signal=23% |
| HALLMARK_UNFOLDED_PROTEIN_RESPONSE         | 112  | 0.338061  | 1.052513  | 0.3631757   | 0.402452  | 1          | 6073        | tags=36%, list=19%, signal=44% |
| HALLMARK_BILE_ACID_METABOLISM              | 110  | 0.333763  | 1.035381  | 0.3952756   | 0.424876  | 1          | 4452        | tags=28%, list=14%, signal=33% |
| HALLMARK_PEROXISOME                        | 95   | 0.330843  | 1.016524  | 0.41815236  | 0.452139  | 1          | 5045        | tags=27%, list=16%, signal=33% |
| HALLMARK_UV_RESPONSE_UP                    | 146  | 0.300791  | 0.971515  | 0.5         | 0.53992   | 1          | 4716        | tags=23%, list=15%, signal=26% |
| HALLMARK_XENOBIOTIC_METABOLISM             | 186  | 0.288914  | 0.969245  | 0.5032051   | 0.529618  | 1          | 1950        | tags=13%, list=6%, signal=14%  |
| HALLMARK_MTORC1_SIGNALING                  | 192  | 0.271304  | 0.909908  | 0.6869301   | 0.655344  | 1          | 4524        | tags=20%, list=14%, signal=23% |
| HALLMARK_HEME_METABOLISM                   | 181  | -0.705776 | -2.520401 | 0           | 0         | 0          | 2079        | tags=41%, list=7%, signal=44%  |
| HALLMARK_E2F_TARGETS                       | 194  | -0.402378 | -1.436097 | 0.008849558 | 0.112048  | 0.25       | 6759        | tags=39%, list=22%, signal=50% |
| HALLMARK_MYC_TARGETS_V2                    | 58   | -0.483633 | -1.433635 | 0.032036614 | 0.07734   | 0.256      | 6555        | tags=40%, list=21%, signal=50% |
| HALLMARK_OXIDATIVE_PHOSPHORYLATION         | 192  | -0.387497 | -1.38086  | 0.008064516 | 0.091393  | 0.378      | 6542        | tags=41%, list=21%, signal=51% |
| HALLMARK_MYC_TARGETS_V1                    | 198  | -0.376228 | -1.322379 | 0.018766755 | 0.127672  | 0.573      | 6895        | tags=39%, list=22%, signal=50% |
| HALLMARK_REACTIVE_OXIGEN_SPECIES_PATHWAY   | 44   | -0.45169  | -1.300947 | 0.09512761  | 0.12587   | 0.636      | 1964        | tags=16%, list=6%, signal=17%  |
| HALLMARK_FATTY_ACID_METABOLISM             | 146  | -0.377512 | -1.294035 | 0.026954178 | 0.114672  | 0.655      | 5483        | tags=29%, list=17%, signal=36% |
| HALLMARK_INTERFERON_ALPHA_RESPONSE         | 88   | -0.383261 | -1.224345 | 0.11566265  | 0.176669  | 0.853      | 4066        | tags=25%, list=13%, signal=29% |
| HALLMARK_DNA_REPAIR                        | 137  | -0.355388 | -1.207079 | 0.104477614 | 0.17956   | 0.881      | 5644        | tags=31%, list=18%, signal=38% |
| HALLMARK_P53_PATHWAY                       | 193  | -0.342755 | -1.197585 | 0.09064327  | 0.174817  | 0.903      | 2509        | tags=18%, list=8%, signal=20%  |
| HALLMARK_G2M_CHECKPOINT                    | 196  | -0.312853 | -1.120742 | 0.16307692  | 0.279972  | 0.982      | 4347        | tags=24%, list=14%, signal=28% |
| HALLMARK_KRAS_SIGNALING_DN                 | 164  | -0.317222 | -1.110837 | 0.1904762   | 0.273652  | 0.99       | 2637        | tags=15%, list=8%, signal=16%  |
| HALLMARK_PROTEIN_SECRETION                 | 94   | -0.337879 | -1.090285 | 0.27118644  | 0.289493  | 0.996      | 1489        | tags=10%, list=5%, signal=10%  |
| HALLMARK_WNT_BETA_CATENIN_SIGNALING        | 41   | -0.297038 | -0.834898 | 0.72477067  | 0.932246  | 1          | 3357        | tags=20%, list=11%, signal=22% |
| HALLMARK_PANCREAS_BETA_CELLS               | 31   | -0.268487 | -0.717687 | 0.91058826  | 0.980013  | 1          | 5756        | tags=23%, list=18%, signal=28% |
