# Supplementary material for: Modulation of Myelopoiesis Progenitors Is an Integral Component of Trained Immunity
Source: PubMed Central journal article supplement — Cell. 2018 Jan 11;172(1-2):147–161.e12. doi: 10.1016/j.cell.2017.11.034 (PMC5766828; doi:10.1016/j.cell.2017.11.034), 2018-01-11
Supplement: mmc4.pdf [file mmc4.pdf]

| Oligonucleotides |                               |
|------------------|-------------------------------|
| β2M FW           | 5'-CTGGTCTTTCTGGTGCTTGTC-3'   |
| β2M RV           | 5'-GTATGTTCTGGCTTCCCATTG-3'   |
| HK2 FW           | 5'-CCGCCGTGGTGGACAAGATA-3'    |
| HK2 RV           | 5'-AGCAGTGATGAGAGCCGCTC-3'    |
| LDHA FW          | 5'-TGCCTACGAGGTGATCAAGCT-3'   |
| LDHA RV          | 5'-GCACCCGCCTAAGGTTCTTC-3'    |
| PFKFB1 FW        | 5'-TCACACCTGTGGCTTATGGCTGC-3' |
| PFKFB1 RV        | 5'-GGGGTTCCTCGGGTTCACGG-3'    |
| PFKFB3 FW        | 5'-GGCATATGGGTGCCGGGTGG-3'    |
| PFKFB3 RV        | 5'-GGTGGGCTCGGGACTGGCTA-3'    |
| PKM2 FW          | 5'-CGCCTGGACATTGACTCTGA-3'    |
| PKM2 RV          | 5'-GAAATTCAGCCGAGCCACATT-3'   |
| TP11 FW          | 5'-CAAACCAAGGTCATCGCAGA-3'    |
| TP11 RV          | 5'-GCCACACAGGTTCATAGGC-3'     |
